# Supplementary material
Source: PubMed Central journal article supplement (PMC3517934)

# Supplemental figure 1

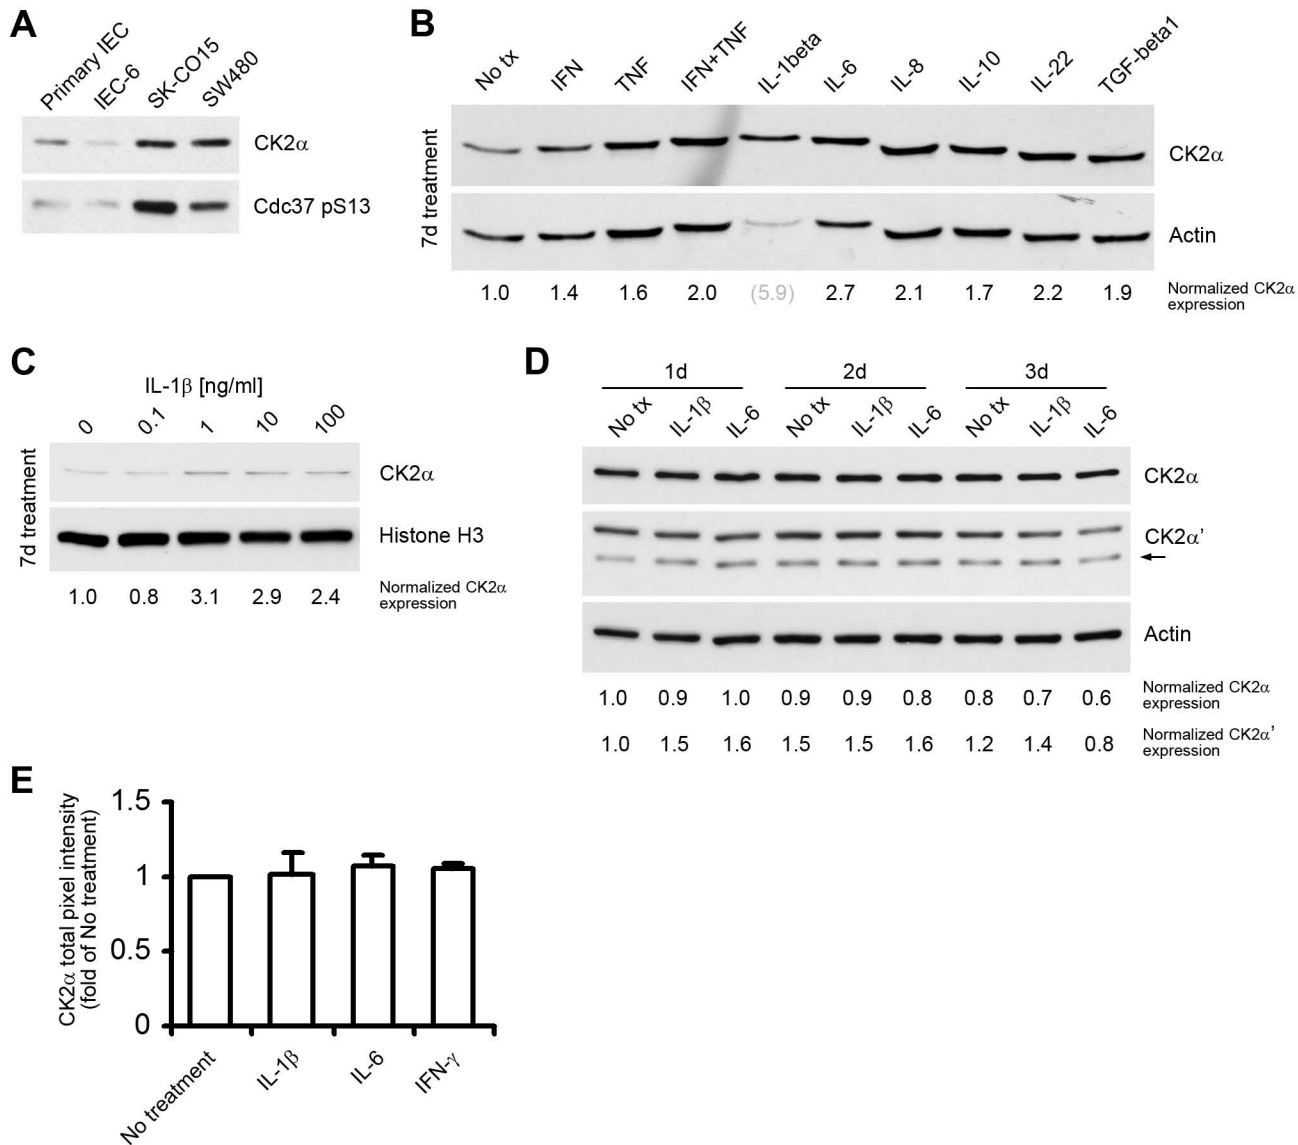

# Supplemental figure 2

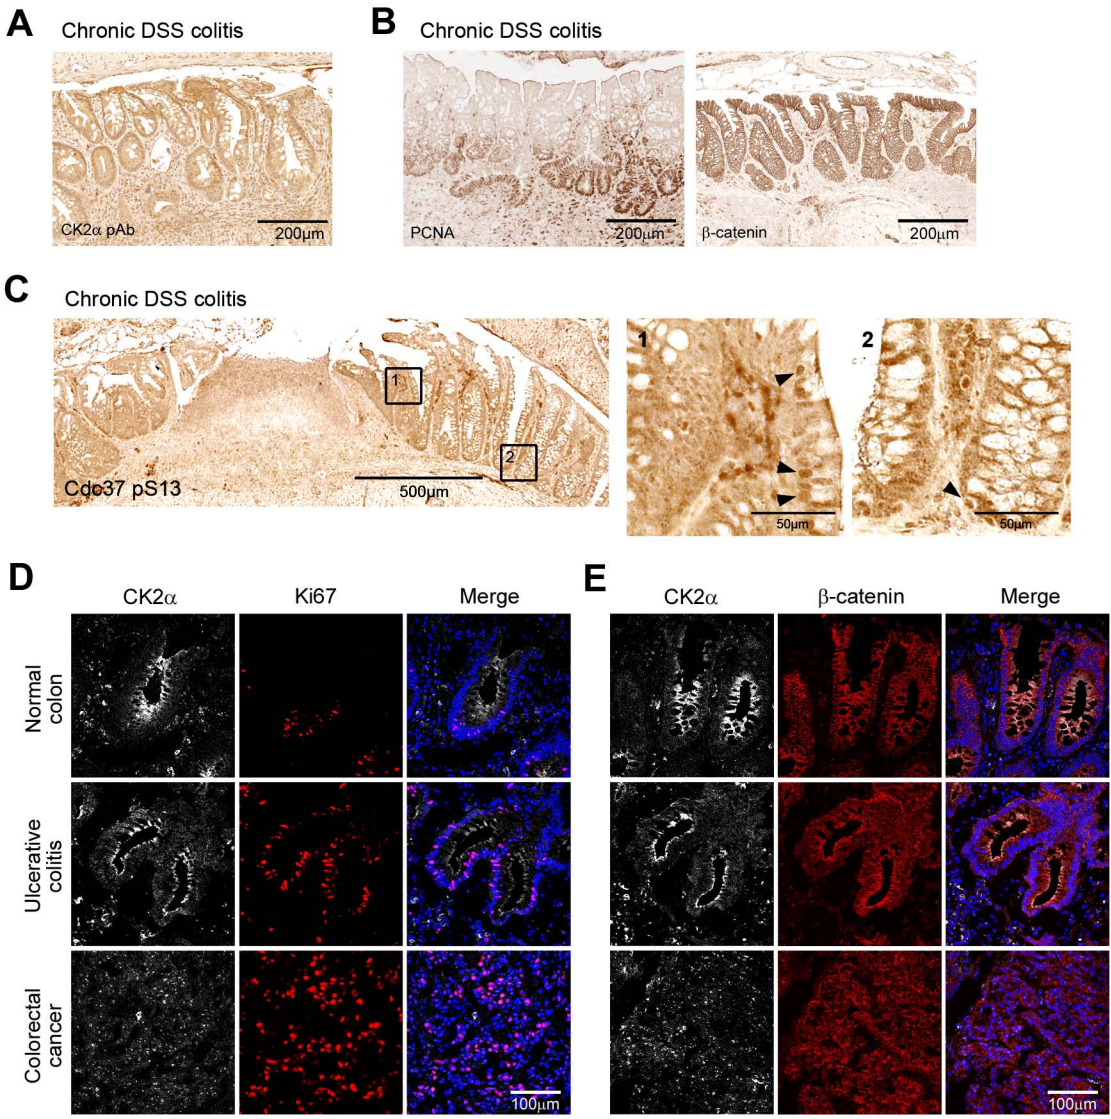

Supplemental figure 3

**A**

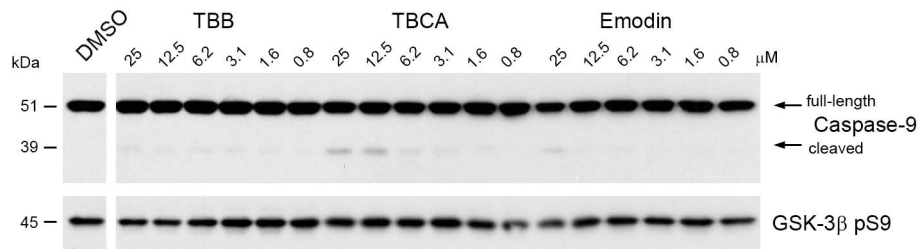

**B**

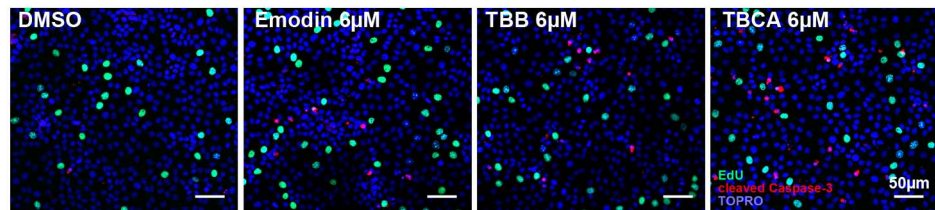

**C**

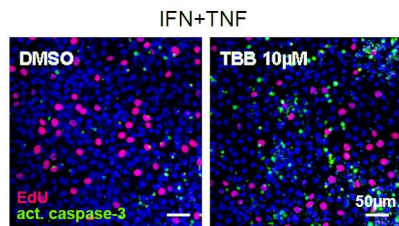

**A**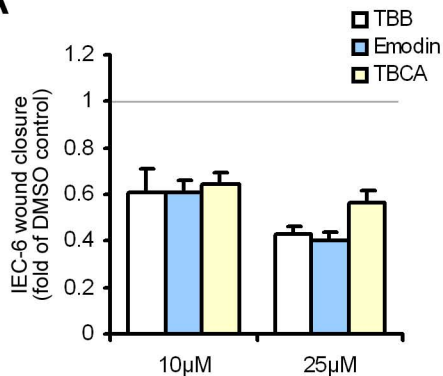**B**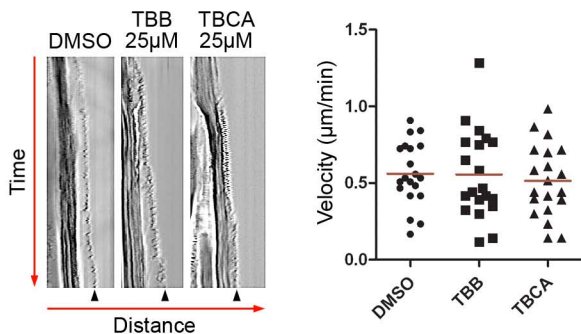**C**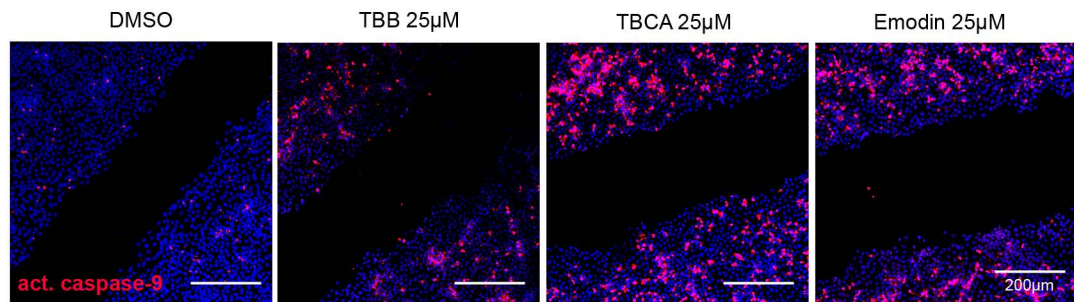**D**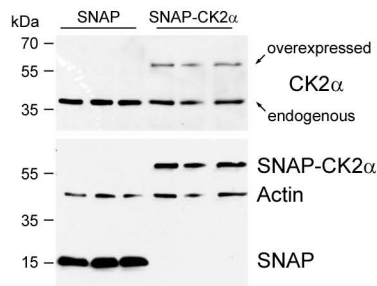**E**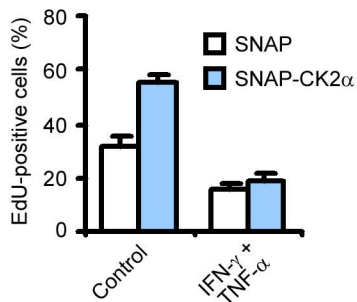

Supplement: NIHMS397439-supplement-S1.pdf [file NIHMS397439-supplement-S1.pdf]
